# Supplementary figures and images for: Novel permittivity gradient carbon nanotubes/cyanate ester composites with high permittivity and extremely low dielectric loss
Source: Royal Society of Chemistry journal article supplement (doi:10.1039/c1jm11794g), 2011-01-01

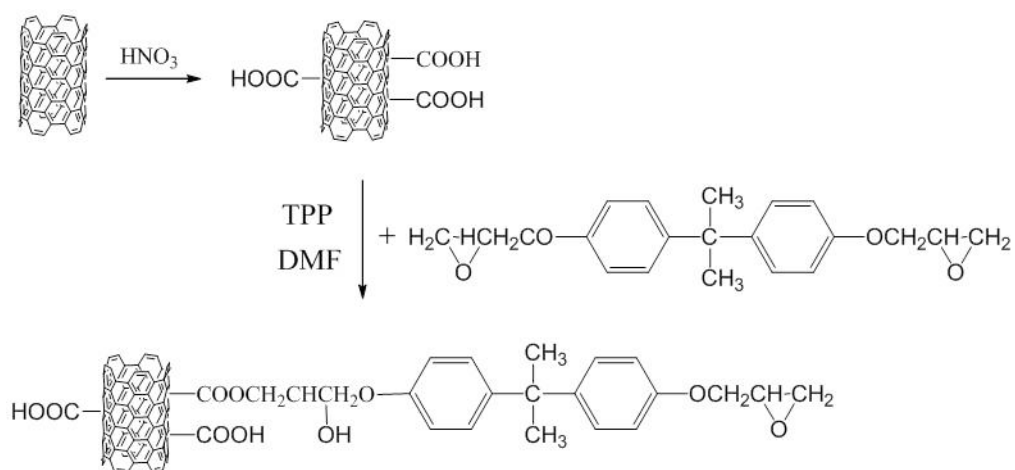

**Scheme 1S** The surface treatment of MCNTs

Supplement: c1jm11794g.pdf [file c1jm11794g.pdf]

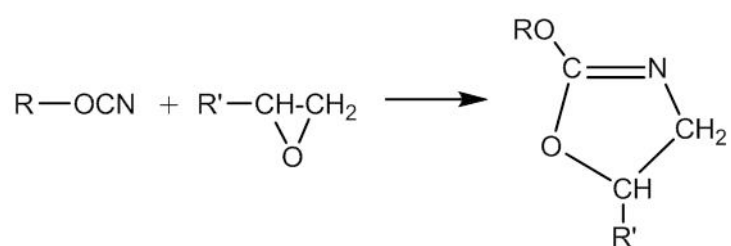

**Scheme 2S** The reaction between epoxide and  $-OCN$  groups

Supplement: c1jm11794g_2.pdf [file c1jm11794g_2.pdf]
